# Supplementary material for: Performance comparison of one-color and two-color platforms within the Microarray Quality Control (MAQC) project
Source: Springer Nature journal article supplement (doi:10.1038/nbt1242), 2006-09-01

### Supplementary Figure 1. Example scatter plot matrices from each platform

**Figure 1A.** Agilent median-normalized one-color data across A samples and sites. Two levels of correlations are shown – intra-site and inter-site. The subscript in the middle of the label indicates the site number. The plots shown are the  $\log_2$  intensities of sample A1 or A2 from the three Agilent test sites.

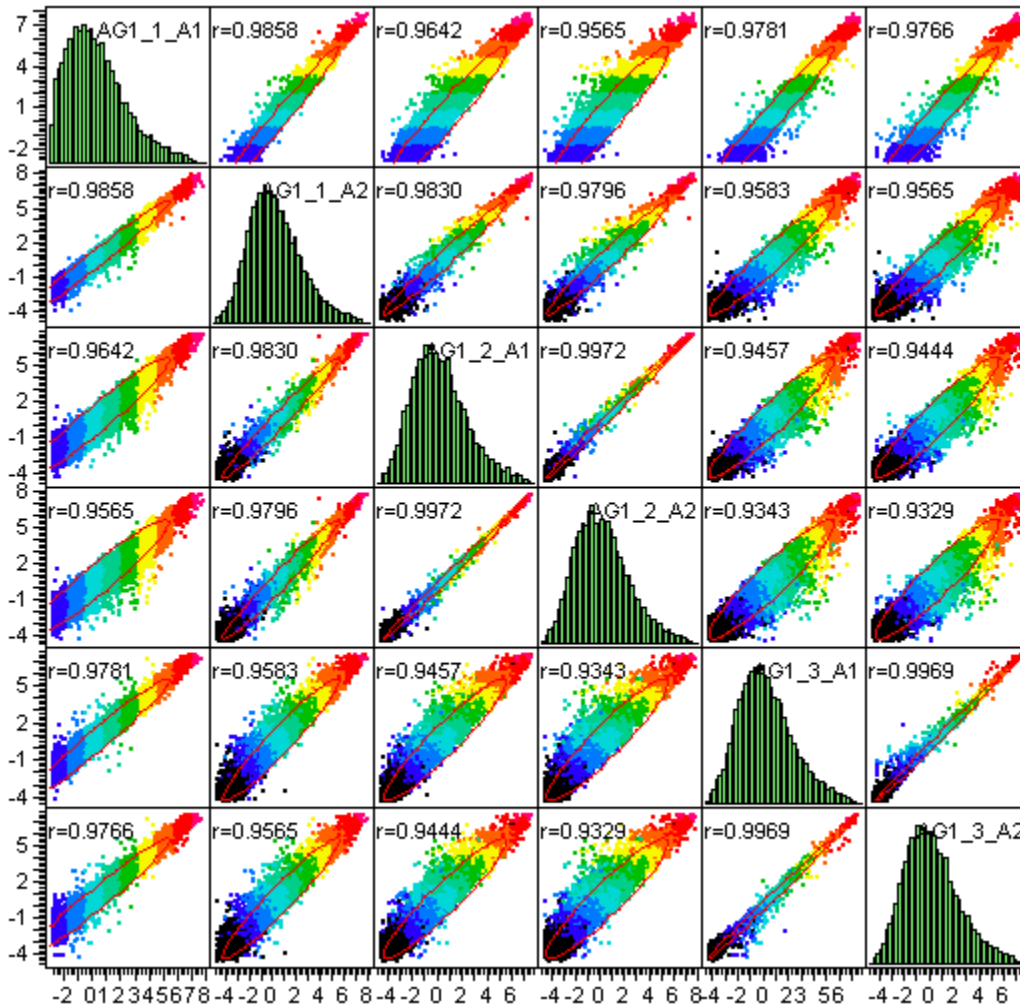

**Figure 1B.** Scatter plots of median normalized one-color CapitalBio data across B samples. The plots shown are the  $\log_2$  intensities of samples B1 to B5.

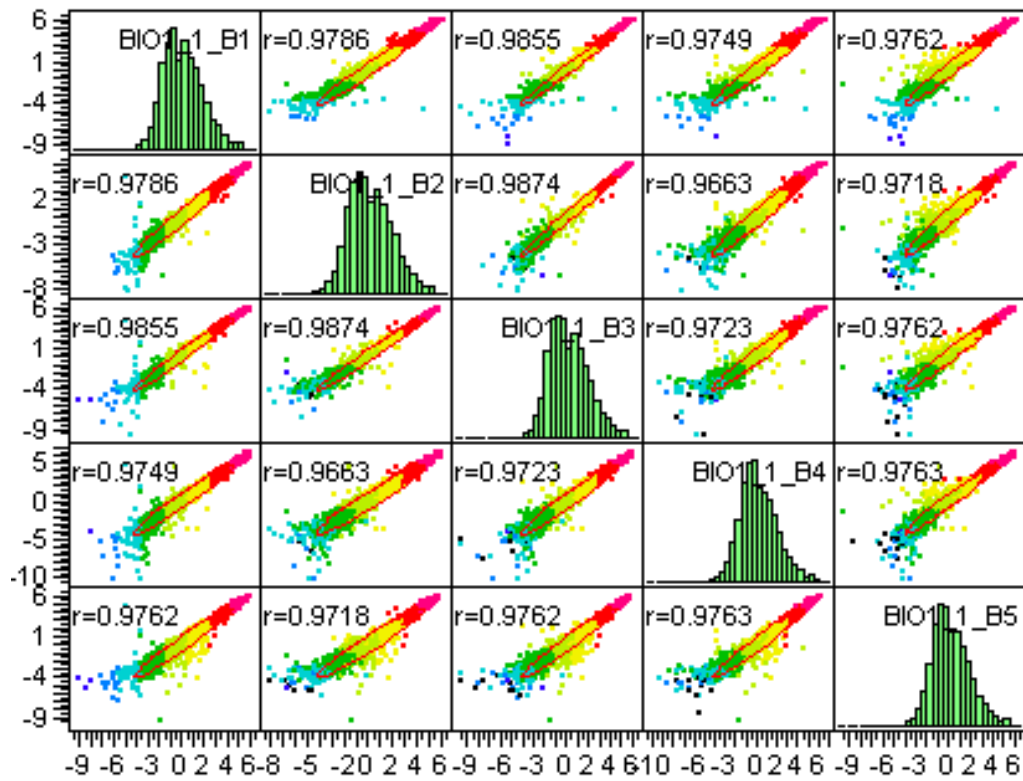

**Figure 1C.** One-color TeleChem data for replicates of Sample A. The plots shown are the  $\log_2$  intensities of samples A1 to A5.  $\log_2$  intensities were median-normalized across samples.

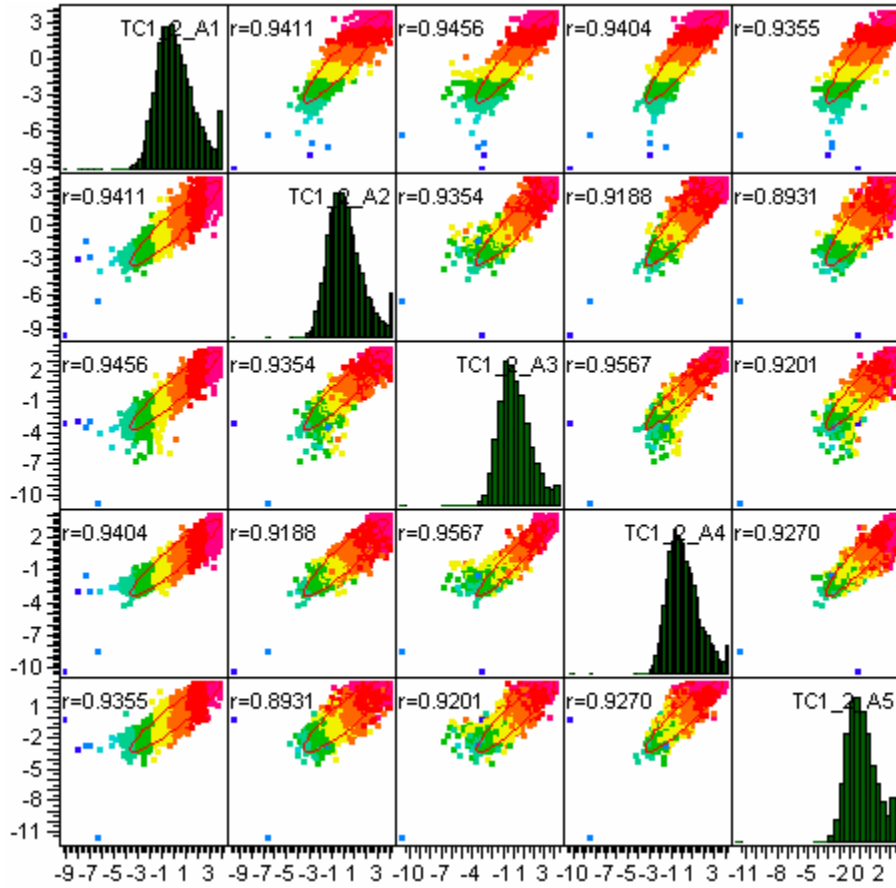

**Figure 1D.** Scatter plots of Agilent C4, C5 RNA pairs from the 3 test sites for the log ratio data. Note that AGL\_2\_C4 is a known outlier and is included for illustration. Note the Agilent two-color ratios (y-axes) are  $\log_{10}$  while the others are  $\log_2$ . Log ratios were median-normalized across samples and sites.

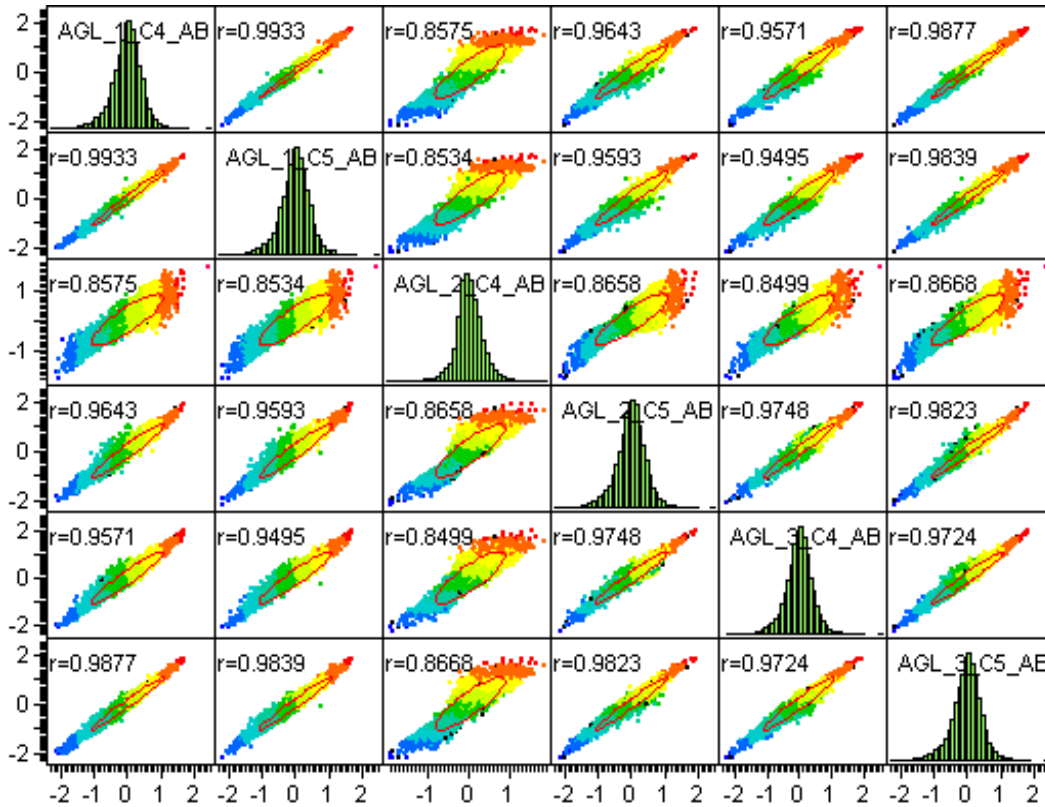

**Figure 1E.** Scatter plots of median normalized CapitalBio log ratio data. The plots shown are the log ratios of samples B1 to B5.

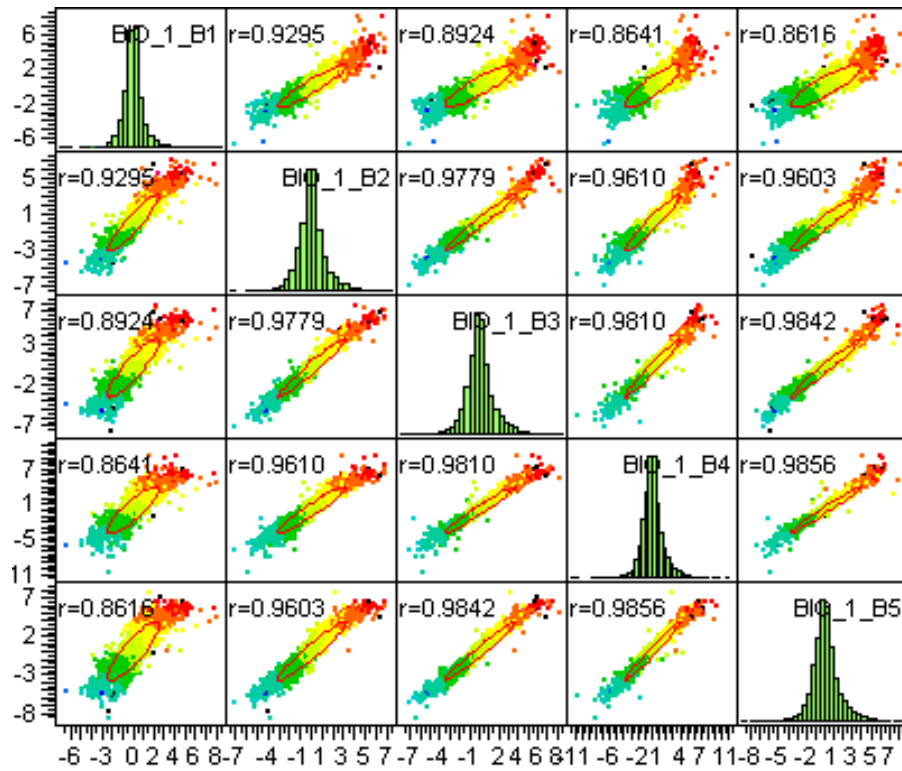

**Figure 1F.** Scatter plots of median normalized TeleChem log ratio data. The plots shown here are the log ratios of samples C1 to C6.

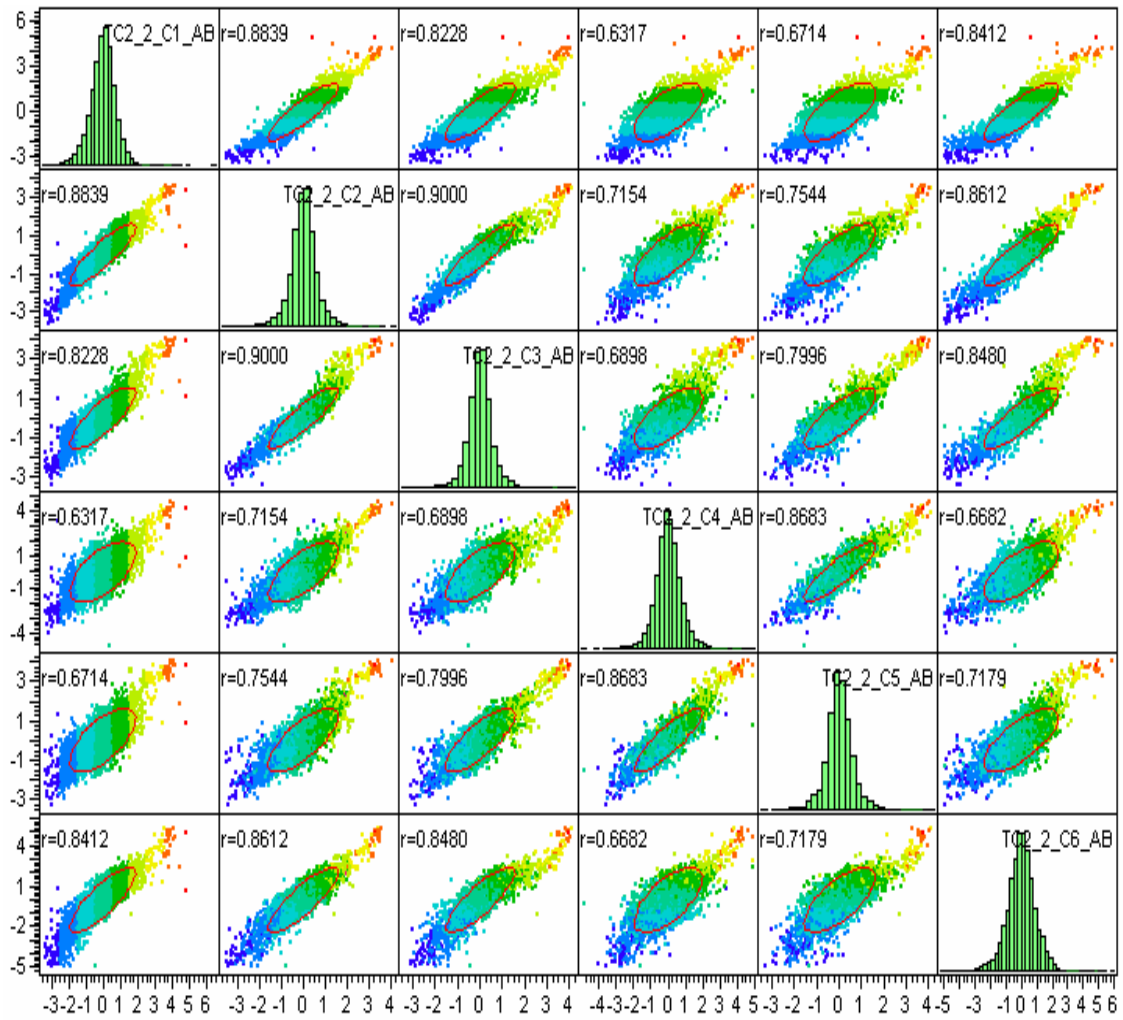

Supplement: nbt1242-S1.pdf [file nbt1242-S1.pdf]
