# Supplementary material for: Performance comparison of one-color and two-color platforms within the Microarray Quality Control (MAQC) project
Source: Springer Nature journal article supplement (doi:10.1038/nbt1242), 2006-09-01

**Supplementary Figure 3. Comparison of the normalization procedures on two-color TeleChem data: Lowess\_Medium Scaling (LO\_MS) versus Medium Scaling\_Lowess (MS\_LO)**

Estimated fold changes (A and B) and negative log  $P$ -values (C and D), generated from ANOVA Models of two-color intensity (TC2I) or two-color ratio (TC2R) data after two different normalization procedures: Lowess first and Medium Scaling second (LO\_MS: y-axes) versus Medium Scaling first and Lowess second (MS\_LO: x-axes). The bivariate plots demonstrate the high correlation of the two normalization procedures. A: estimated fold-change from two-color intensity; B: estimated fold-change from two-color ratio; C: negative log  $P$ -values from two-color intensity; and D: negative log  $P$ -values from two-color ratio. The red lines are 45 degree reference lines and the statistics for correlation ( $R$ ) are inset in each graph.

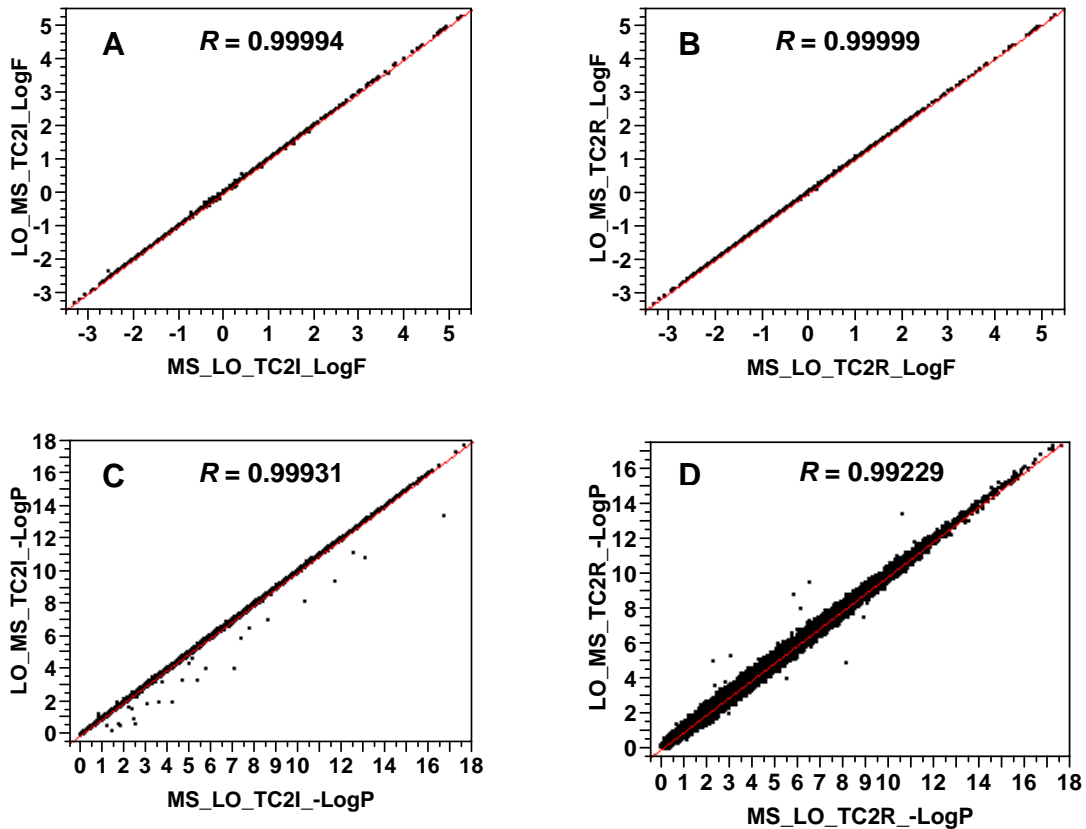

Supplement: nbt1242-S3.pdf [file nbt1242-S3.pdf]
